# Supplementary material
Source: PubMed Central journal article supplement (PMC5494978)
Supplement: NIHMS861786-supplement-ESI.pdf [file NIHMS861786-supplement-ESI.pdf]

## Supplementary Material

### **Inhibiting the BfrB:Bfd Interactions in *Pseudomonas aeruginosa* Causes Irreversible Iron Accumulation in Bacterioferritin and Iron Deficiency in the Bacterial Cytosol**

Kate Eshelman,<sup>a,c</sup> Huili Yao,<sup>a,c</sup> Achala N. D. Punchi Hewage,<sup>a</sup> Jacqueline J. Deay,<sup>b</sup> Josephine R. Chandler<sup>b</sup> and Mario Rivera\*<sup>a</sup>

---

<sup>a</sup>Department of Chemistry and R. N. Adams Institute for Bioanalytical Chemistry, University of Kansas, Multidisciplinary Research Building, 2030 Becker Dr., Lawrence, KS, 66047. E-mail: [mrivera@ku.edu](mailto:mrivera@ku.edu); Tel: 785-550-0402

<sup>b</sup>Department of Molecular Biosciences, University of Kansas, 1200 Sunnyside Avenue, Lawrence, KS, 66045.

<sup>c</sup>These authors contributed equally

---

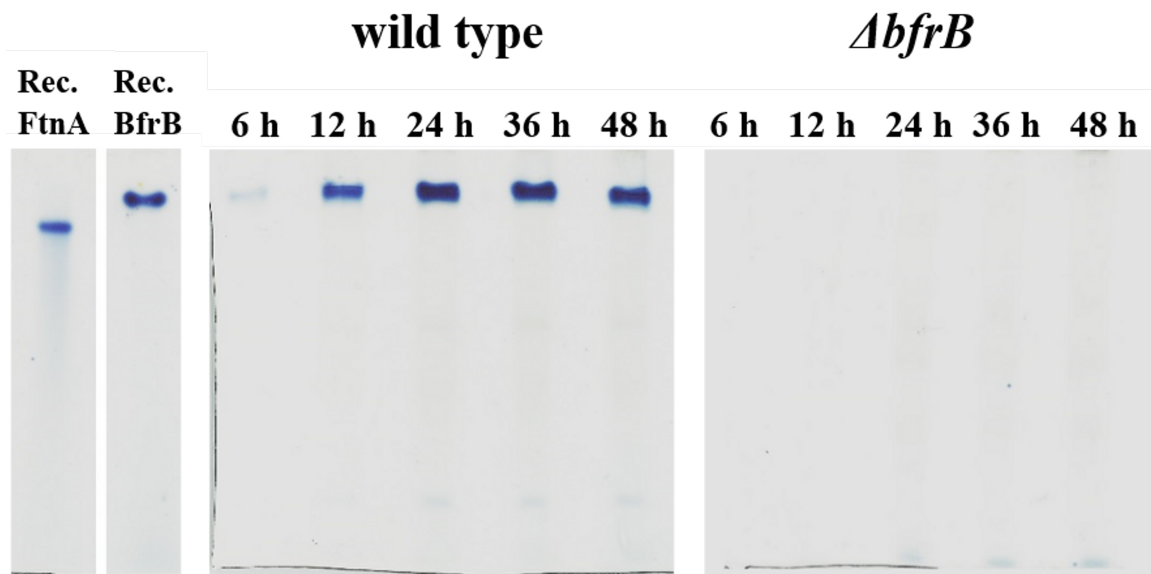

**Figure S1.** PAGE gels stained with Ferene-S. Left: Recombinant FtnA (Rec. FtnA) and recombinant BfrB (Rec. BfrB). Center: Lanes loaded with lysates of wild type *P. aeruginosa* cultured in PI media supplemented with 30  $\mu$ M Fe show only iron-stained bands migrating with the electrophoretic mobility of BfrB. Right: Lanes loaded with lysates of  $\Delta bfrB$  cultured in PI media supplemented with 30  $\mu$ M Fe show that iron is not accumulated in FtnA, or in any other protein.

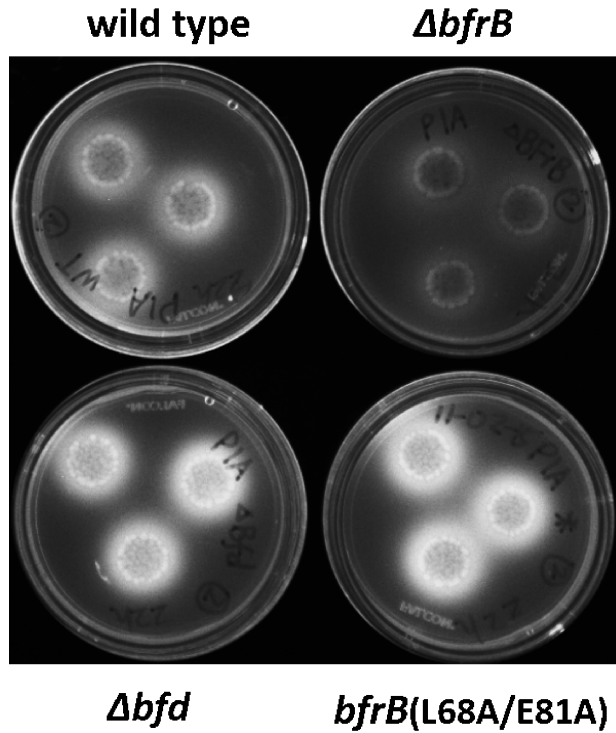

**Figure S2.** *P. aeruginosa* cells, wild type and mutants, were spotted on PIA plates and cultured for 22 h. Illuminating the plates with UV-light from the bottom reveals a fluorescent green-yellow color on the cells and their surrounding area caused by Pvd fluorescence. The comparison shows that  $\Delta bfd$  and  $bfrB(L68A/E81A)$  cells secrete significantly more Pvd than the wild type and  $\Delta bfrB$  cells.

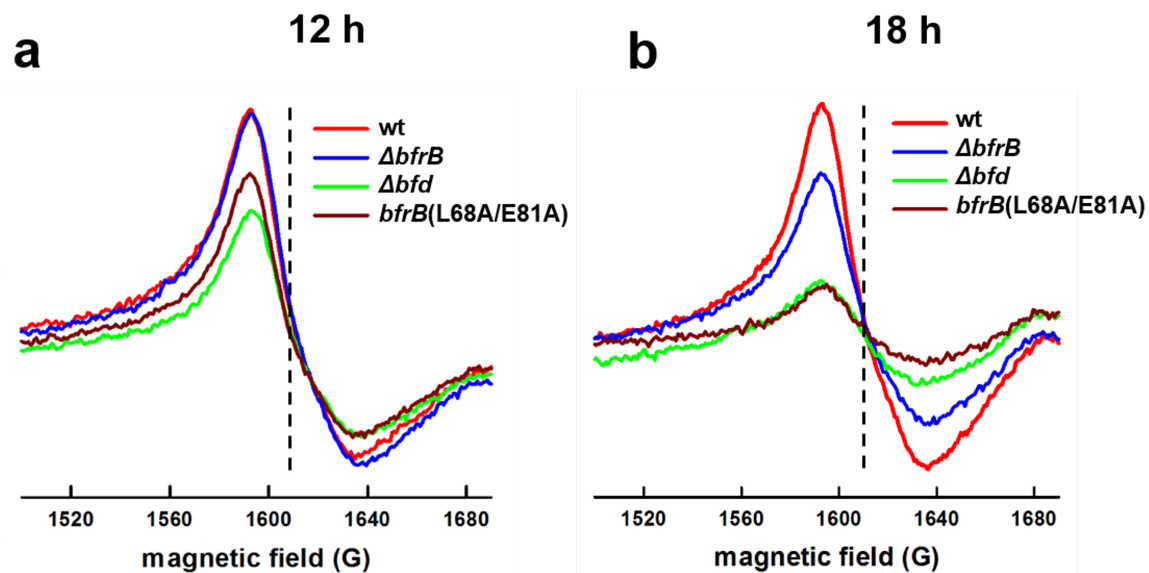

**Figure S3.** Whole-cell EPR spectra obtained from *P. aeruginosa* cells (wild type and mutants) harvested at (a) 12 h and (b) 18 h post inoculation. Cells were cultured in PI media supplemented with 10  $\mu$ M Fe, and treated as described in Methods prior to EPR spectroscopic analysis. The vertical segmented line indicates  $g = 4.3$ .

**Table S1. Plasmids**

---

|                                       |                                                                                                                   |            |
|---------------------------------------|-------------------------------------------------------------------------------------------------------------------|------------|
| pEXG2                                 | Allelic exchange vector with pBR origin; <i>sacB</i> , Gm <sup>r</sup>                                            | (1)        |
| pEXG2 $\Delta bfrB$                   | pEXG2 with $\Delta bfrB$ extending from +96 to +468 with respect to the translational start site; Gm <sup>r</sup> | This study |
| pEXG2 $\Delta bfd$                    | pEXG2 with $\Delta bfd$ extending from +22 to +222 with respect to the translational start site; Gm <sup>r</sup>  | This study |
| pEXG2 <i>bfrB</i> (L68A/E81A)         | pEXG2 with the <i>bfrB</i> allele with the base substitutions C202G, T203C and A242C                              | This study |
| pUC18---mini---Tn7T---LAC             | Suicide delivery vector for insertion at <i>attTn7</i> site, Gm <sup>r</sup>                                      | (2)        |
| pUC18---mini---Tn7T---LAC <i>bfrB</i> | pUC18---mini---Tn7T---LAC with P <sub>lac</sub> -driven <i>bfrB</i>                                               | This study |
| pUC18---mini---Tn7T---LAC <i>bfd</i>  | pUC18---mini---Tn7T---LAC with P <sub>lac</sub> -driven <i>bfd</i>                                                | This study |
| pTNS2                                 | T7 transposase expression vector; R6K <i>ori</i> , <i>ori</i> T, Ap <sup>r</sup>                                  | (3)        |
| pFLP2                                 | Site---specific excision vector; <i>sacB</i> , <i>ori</i> T, Cb <sup>r</sup>                                      | (4)        |

---

**Table S2. Primers**

---

***Primers used to make pEXG2 ΔbfrB:***

---

|                  |                                                    |
|------------------|----------------------------------------------------|
| BfrB d1 XbaI     | TAATAATCTAGAGCCTTGCGATCTCGTGCTTGGTG                |
| BfrB d2          | GCTTCGTCGTGGTTCCCGATCAGTCGTCGCCTTTCATGCCGAATCCTGCC |
| BfrB d3          | GGCAGGATTCGGCATGAAAGGCGACGACTGATCGGGAACACGACGAAGC  |
| BfrB d4b HindIII | TTAAATAAGCTTCCACATGCGCGAGTGGAGGAAGTACTG            |

---

***Primers used to make pEXG2 Δbfd:***

---

|                |                                                              |
|----------------|--------------------------------------------------------------|
| Bfd d1 XbaI    | TAATAATCTAGACTCGCGAGCCCATGAAAAAGCCC                          |
| Bfd d2         | GTTCTTCTGAAAGAGGGATAAAAAATATTTTTCAGGCTTGGCAGAGGCAGACGTACATGG |
| Bfd d3         | CATGTACGTCTGCCTCTGCCAAGCCTGAAAAATATTTTTATCCCTCTTTCAGAAGAACC  |
| Bfd d4 HindIII | TAATAAAAGCTTCGCTGAGCATCGCCGGTTTC                             |

---

***Primers used to make pUC18-mini-Tn7T-LAC bfrB:***

---

|                 |                                                                 |
|-----------------|-----------------------------------------------------------------|
| BfrB 5' SpeI    | TAA TAA ACT AGT ATG AAA GGC GAC AAG AAA GTC ATC CAG CAC CTC AAC |
| BfrB 3' HindIII | TAA TAA AAG CTT TCC CGA TCA GTC GTC TTC GTG CAT GTG             |

---

***Primers used to make pUC18-mini-Tn7T-LAC bfd:***

---

|                |                                                         |
|----------------|---------------------------------------------------------|
| Bfd 5' SpeI    | TAA TAA ACT AGT ATG TAC GTC TGC CTC TGC CAA GGT GTT ACC |
| Bfd 3' HindIII | TAA TAA AAG CTT TCA GGC AGC GAC GAA CGC CGT AGT C       |

---

## References

1. Rietsch, A., Vallet-Gely, I., Dove, S. L., and Mekalanos, J. J. (2005) ExsE, a secreted regulator of type III secretion genes in *Pseudomonas aeruginosa*, *Proceedings of the National Academy of Sciences* 102, 8006-8011.
2. Choi, K.-H., and Schweizer, H. P. (2006) mini-Tn7 insertion in bacteria with single attTn7 sites: example *Pseudomonas aeruginosa*, *Nature protocols* 1, 153-161.
3. Choi, K.-H., Gaynor, J. B., White, K. G., Lopez, C., Bosio, C. M., Karkhoff-Schweizer, R. R., and Schweizer, H. P. (2005) A Tn7-based broad-range bacterial cloning and expression system, *Nature methods* 2, 443-448.
4. Hoang, T. T., Karkhoff-Schweizer, R. R., Kutchma, A. J., and Schweizer, H. P. (1998) A broad-host-range F<sub>1</sub>p-FRT recombination system for site-specific excision of chromosomally-located DNA sequences: application for isolation of unmarked *Pseudomonas aeruginosa* mutants, *Gene* 212, 77-86.
